# Supplementary material for: Protective and Educational Effects of Physical Activity Practice on Mental Health in Young Age during COVID-19 Lockdown
Source: MDPI journal article supplement (doi:10.3390/su15010752), 2022-12-31
Supplement: s1 [file s1]

## PROTOCOLLO DI RICERCA

Salve, siamo un gruppo di ricercatori del Dipartimento SPPPF dell'Università degli Studi di Palermo e stiamo conducendo una ricerca finalizzata ad analizzare il modo in cui, nel corso dell'ultimo anno, la pandemia COVID-19 ha condizionato le nostre vite, obbligandoci a modificare le nostre abitudini e i nostri programmi in diversi contesti di vita.

Nella presente ricerca, stiamo esplorando il modo in cui la pandemia COVID-19 incide nelle abitudini e strategie di studio degli studenti universitari e alcuni correlati psicologici ad essa asse associati.

Se vuoi partecipare, ti chiediamo di leggere prima la Sezione informativa sulla partecipazione alla ricerca che presenta i dettagli dello studio e il modulo per il consenso informato.

SCHERMATA SEZIONE INFORMATIVA PARTECIPAZIONE ALLA RICERCA E AL TRATTAMENTO DEI DATI PERSONALI (si veda file allegato).

SCHERMATA ESPRESSIONE CONSENSO INFORMATO PARTECIPAZIONE ALLA RICERCA (si veda file allegato).

SCHERMATA ESPRESSIONE CONSENSO TRATTAMENTO DATI PERSONALI (si veda file allegato).

## SCHEMA SOCIO-ANAGRAFICA

**Età** (*inserisci l'età in formato numerico. p.e. 27*)

---

### **Nazionalità**

Italiana

Straniera

### **Corso di Laurea**

Triennale

Magistrale

Ciclo Unico

### **Area di Studio Universitario**

Area Architettura

Area Scienze Mediche

Area Scienze Biologiche

Area Scienze Agrarie

Area Lettere

Area Lingue Straniere

Area Storia e Filosofia

Area Beni Culturali

Area Arte e Musica

Area Scienze Sociali

Area Comunicazione

Area Fisica e Chimica

Area Matematica e Informatica

Area Scienze Economiche e Aziendali

Area Ingegneria

Area Psicologica  
Area Pedagogia e Formazione  
Area Scienze Motorie  
Area Giuridica  
Area Scienze Politiche

**Anno di Corso**

Primo  
Secondo  
Terzo  
Quarto  
Quinto  
Sesto  
Fuori corso

**Status**

In corso  
Fuori corso

**Titolo di studio precedente**

Area Umanistica  
Area Scientifica  
Area Linguistica  
Area Artistica  
Area Tecnica  
Area Professionale  
Altro .....

**Se studente lavoratore, tipologia di lavoro:**

Operaio/a  
Impiegato/a  
Dirigente  
Artigiano/a  
Commerciante  
Libero Professionista  
Docente  
Disoccupato/a  
In cerca di occupazione  
Pensionato/a

**Durante la pandemia Covid-19** *(Risponda solo se è uno studente lavoratore):*

Ha lavorato in smart working  
Ha lavorato presso la sede lavorativa  
Non ha lavorato perché ha dovuto sospendere la sua attività  
Non ha lavorato perché in cassa integrazione  
Ha perso il lavoro

**Nell'ultimo anno dove ha vissuto?**

In appartamento in città  
In abitazione con ampi spazi esterni in città  
In appartamento in provincia di medie dimensioni (meno di 60.000 abitanti)  
In abitazione con ampi spazi esterni in provincia di medie dimensioni (meno di 60.000 abitanti)

In appartamento di campagna o al mare  
In abitazione di campagna o al mare

**Nell'ultimo anno ha co-abitato con qualcuno?**

Famiglia di origine  
Colleghi di università  
Partner  
Colleghi di lavoro

**Durante la pandemia Covid-19 ha seguito le lezioni a distanza?**

SI  
NO

**Quali caratteristiche, secondo lei, definirebbero il rapporto con i docenti durante le lezioni online:**

maggior interazione con il docente  
minore interazione con il docente  
maggior inibizione nel porre domande  
minore inibizione nel porre domande  
maggior difficoltà nel chiedere spiegazioni aggiuntive/chiarimenti  
minore difficoltà nel chiedere spiegazioni aggiuntive/chiarimenti

**Nell'ultimo anno nella sua abitazione ha avuto uno spazio riservato e adeguato allo studio?**

SI  
NO

**Nell'ultimo anno ha modificato le sue abitudini di studio?**

SI  
NO

**Prima della pandemia da Covid-19, le sue abitudini di studio erano:**

|                                              | mai | raramente | spesso | molto spesso | sempre |
|----------------------------------------------|-----|-----------|--------|--------------|--------|
| Rispettare orari di studio prestabiliti      | 1   | 2         | 3      | 4            | 5      |
| Avere orari di studio flessibili             |     |           |        |              |        |
| Prendere appunti durante le lezioni          |     |           |        |              |        |
| Studiare da solo                             |     |           |        |              |        |
| Studiare con colleghi                        |     |           |        |              |        |
| Studiare a casa                              |     |           |        |              |        |
| Studiare in biblioteca o altri luoghi comuni |     |           |        |              |        |

**Durante la pandemia da Covid-19, le sue abitudini di studio sono:**

|                                              | <b>mai</b> | <b>raramente</b> | <b>spesso</b> | <b>molto spesso</b> | <b>sempre</b> |
|----------------------------------------------|------------|------------------|---------------|---------------------|---------------|
| Rispettare orari di studio prestabiliti      | 1          | 2                | 3             | 4                   | 5             |
| Avere orari di studio flessibili             |            |                  |               |                     |               |
| Prendere appunti durante le lezioni          |            |                  |               |                     |               |
| Studiare da solo                             |            |                  |               |                     |               |
| Studiare con colleghi                        |            |                  |               |                     |               |
| Studiare a casa                              |            |                  |               |                     |               |
| Studiare in biblioteca o altri luoghi comuni |            |                  |               |                     |               |

**Nell'ultimo anno ha modificato le sue strategie di studio?**

SI

NO

**Prima della pandemia da Covid-19, impiegava le strategie di studio:**

|                                                                                                        | <b>mai</b> | <b>raramente</b> | <b>spesso</b> | <b>molto spesso</b> | <b>sempre</b> |
|--------------------------------------------------------------------------------------------------------|------------|------------------|---------------|---------------------|---------------|
| Riassumere                                                                                             | 1          | 2                | 3             | 4                   | 5             |
| Creare mappe concettuali                                                                               |            |                  |               |                     |               |
| Sottolineare/evidenziare,<br>Segnare parole chiave                                                     |            |                  |               |                     |               |
| Rileggere più volte i contenuti oggetto di studio                                                      |            |                  |               |                     |               |
| Suddividere lo studio in più momenti organizzati, ad esempio in più giornate                           |            |                  |               |                     |               |
| Autointerrogarsi sui contenuti appena studiati attraverso domande formulate da sé o proposte dal libro |            |                  |               |                     |               |
| Intervallare più materie o esercizi o compiti nella stessa sessione di studio                          |            |                  |               |                     |               |

|                                                                                                                                   |  |  |  |  |  |
|-----------------------------------------------------------------------------------------------------------------------------------|--|--|--|--|--|
| Autoesaminarsi svolgendo esercizi/questionari su argomenti studiati o test di riepilogo                                           |  |  |  |  |  |
| Autospiegazioni, ovvero dare spiegazioni, anche personali, o formulare ipotesi sulla causa dei fatti, concetti, fenomeni studiati |  |  |  |  |  |
| Creare immagini mentali dei contenuti di studio                                                                                   |  |  |  |  |  |
| Ripetere a voce alta                                                                                                              |  |  |  |  |  |

**Durante la pandemia da Covid-19, impiega le strategie di studio:**

|                                                                                                                                   | <b>mai</b> | <b>raramente</b> | <b>spesso</b> | <b>molto spesso</b> | <b>sempre</b> |
|-----------------------------------------------------------------------------------------------------------------------------------|------------|------------------|---------------|---------------------|---------------|
| Riassumere                                                                                                                        | 1          | 2                | 3             | 4                   | 5             |
| Creare mappe concettuali                                                                                                          |            |                  |               |                     |               |
| Sottolineare/evidenziare, Segnare parole chiave                                                                                   |            |                  |               |                     |               |
| Rileggere più volte i contenuti oggetto di studio                                                                                 |            |                  |               |                     |               |
| Suddividere lo studio in più momenti organizzati, ad esempio in più giornate                                                      |            |                  |               |                     |               |
| Autointerrogarsi sui contenuti appena studiati attraverso domande formulate da sé o proposte dal libro                            |            |                  |               |                     |               |
| Intervallare più materie o esercizi o compiti nella stessa sessione di studio                                                     |            |                  |               |                     |               |
| Autoesaminarsi svolgendo esercizi/questionari su argomenti studiati o test di riepilogo                                           |            |                  |               |                     |               |
| Autospiegazioni, ovvero dare spiegazioni, anche personali, o formulare ipotesi sulla causa dei fatti, concetti, fenomeni studiati |            |                  |               |                     |               |
| Creare immagini mentali dei contenuti di studio                                                                                   |            |                  |               |                     |               |
| Ripetere a voce alta                                                                                                              |            |                  |               |                     |               |

**Nell'ultimo anno ha sostenuto esami a distanza? Se Si, quanti?**

SI

NO

N° Esami \_\_\_\_\_

N° CFU totali finora acquisiti \_\_\_\_\_

**Nell'ultimo anno ha rispettato il piano di organizzazione degli esami che aveva pianificato?**

SI

NO

**Quanti esami aveva programmato di sostenere nel corso dell'ultimo anno?**

\_\_\_\_\_ (indichi il numero)

**Può indicare la media dei suoi voti?**

\_\_\_\_\_ (indichi la media)

**Come definirebbe la sua motivazione allo studio nel corso dell'ultimo anno?**

Invariata rispetto a prima della pandemia da COVID-19

Aumentata rispetto a prima della pandemia da COVID-19

Diminuita rispetto a prima della pandemia da COVID-19

**Nelle ultime 4 settimane, ha ripreso le abitudini che aveva prima della pandemia COVID-19?**

Si

No

**Se ha ripreso le sue abitudini di prima, quali abitudini (può fare anche più di una scelta)?**

Frequentare bar/ristoranti/pub

Frequentare discoteche (quando consentito)

Frequentare palestre/centri benessere (quando consentito)

Frequentare centri estetici

Assistere a spettacoli in luoghi chiusi (p.e. cinema, teatro) (quando consentito)

Assistere a spettacoli all'aperto (p.e. fiere, concerti)

Fare shopping

Altro.....

**Ha ristabilito le relazioni sociali che aveva prima della pandemia Covid-19?**

Si

No

**Se ha ristabilito le relazioni sociali di prima, con chi?**

Partner

Famiglia allargata

Amici

Colleghi di università

Altro .....

**Durante il periodo di pandemia Covid-19, ha mantenuto le relazioni sociali attraverso i social media?**

Si

No

**Se ha usato i social media per mantenere relazioni sociali, sta continuando ad utilizzarli come mezzo privilegiato per mantenere le sue relazioni sociali?**

Si

No

**Se Si, con quale frequenza giornaliera?**

Meno di una volta al giorno

1-2 volte al giorno

3-5 volte al giorno

>5 volte al giorno

**Se Si, quali applicazioni utilizza maggiormente per mantenere le sue relazioni sociali?**

Whatsapp

Messenger

Instagram

Facebook

Altro \_\_\_\_\_

**Se Si, quali strumenti tecnologici preferisce maggiormente per mantenere le sue relazioni sociali?**

Chat testuali

Videochiamate

Storie o status postati online

Sessioni interattive di gioco online

Altro \_\_\_\_\_

**Ha programmato vacanze nei prossimi 6 mesi?**

Si

No

**Se si, dove?**

Nella sua regione

In altre regioni

All'estero

**Ha avuto bisogno del sostegno di qualcuno durante la pandemia Covid-19?**

Si

No

**Se si, a chi si è rivolto?**

al partner

a un amico

a un familiare

a un professionista della salute (psicologo, medico....)  
a un padre spirituale  
altro.....

**Ha avuto problemi di salute nuovi durante la pandemia Covid-19?**

Si  
No

**Se si, quali?**

Problemi di natura organica e/o funzionale (es. problemi gastro/intestinali, problemi respiratori, cefalee, .....)

Ansia

Insonnia

Alterazione del tono dell'umore

Inappetenza

Astenia

Altro.....

**Cosa pensa sull'evoluzione della pandemia Covid-19?**

Sta per finire

Durerà ancora per tanto tempo

Non finirà mai

Non ha idea



## ACADEMIC MOTIVATION SCALE (AMS-C 28 – VALLERAND ET AL, 1989)

### PERCHÉ VAI ALL'UNIVERSITÀ?

*Facendo riferimento alla scala che trovi sotto, Indica in che misura ognuna delle seguenti affermazioni al momento corrisponde a uno dei motivi per i quali vai all'università*

Pochissimo

Poco

Molto

Moltissimo

|   |   |   |   |
|---|---|---|---|
| 1 | 2 | 3 | 4 |
|---|---|---|---|

### PERCHÉ VAI ALL'UNIVERSITÀ?

1. Perché con il solo diploma di scuola superiore non troverei un lavoro molto remunerativo dopo

|   |   |   |   |
|---|---|---|---|
| 1 | 2 | 3 | 4 |
|---|---|---|---|

2. Perché provo piacere e soddisfazione quando imparo contenuti nuovi

|   |   |   |   |
|---|---|---|---|
| 1 | 2 | 3 | 4 |
|---|---|---|---|

3. Perché penso che l'istruzione/formazione universitaria mi aiuterà per la carriera che ho scelto

|   |   |   |   |
|---|---|---|---|
| 1 | 2 | 3 | 4 |
|---|---|---|---|

4. Per i sentimenti intensi che provo quando comunico le mie idee agli altri

|   |   |   |   |
|---|---|---|---|
| 1 | 2 | 3 | 4 |
|---|---|---|---|

5. Onestamente, non lo so. Penso sinceramente che sto perdendo il mio tempo all'università

|   |   |   |   |
|---|---|---|---|
| 1 | 2 | 3 | 4 |
|---|---|---|---|

6. Per il piacere che provo quando supero me stesso nello studio

|   |   |   |   |
|---|---|---|---|
| 1 | 2 | 3 | 4 |
|---|---|---|---|

7. Per dimostrare a me stesso di essere capace di conseguire la laurea

|   |   |   |   |
|---|---|---|---|
| 1 | 2 | 3 | 4 |
|---|---|---|---|

8. Per avere un lavoro più prestigioso dopo

|   |   |   |   |
|---|---|---|---|
| 1 | 2 | 3 | 4 |
|---|---|---|---|

9. Per il piacere che provo quando scopro nuovi contenuti mai visti prima

|   |   |   |   |
|---|---|---|---|
| 1 | 2 | 3 | 4 |
|---|---|---|---|

10. Perché alla fine mi consentirà di entrare nel mercato del lavoro in un campo che mi piace

|   |   |   |   |
|---|---|---|---|
| 1 | 2 | 3 | 4 |
|---|---|---|---|

11. Per il piacere che provo quando leggo autori interessanti

|   |   |   |   |
|---|---|---|---|
| 1 | 2 | 3 | 4 |
|---|---|---|---|

12. Una volta avevo buone ragioni per andare all'università, tuttavia ora mi chiedo se continuare

|   |   |   |   |
|---|---|---|---|
| 1 | 2 | 3 | 4 |
|---|---|---|---|

13. Per il piacere che provo quando supero i miei traguardi

|   |   |   |   |
|---|---|---|---|
| 1 | 2 | 3 | 4 |
|---|---|---|---|

14. Perché considero importante avere successo all'università

|   |   |   |   |
|---|---|---|---|
| 1 | 2 | 3 | 4 |
|---|---|---|---|

15. Perché voglio fare la “bella vita” dopo

|   |   |   |   |
|---|---|---|---|
| 1 | 2 | 3 | 4 |
|---|---|---|---|

16. Per il piacere che provo nell'ampliare le mie conoscenze in materie che mi piacciono

|   |   |   |   |
|---|---|---|---|
| 1 | 2 | 3 | 4 |
|---|---|---|---|

17. Perché questo mi aiuterà nelle scelte di orientamento al lavoro

|   |   |   |   |
|---|---|---|---|
| 1 | 2 | 3 | 4 |
|---|---|---|---|

18. Per il piacere che provo quando mi sento completamente assorbito da quello che hanno scritto alcuni autori

|   |   |   |   |
|---|---|---|---|
| 1 | 2 | 3 | 4 |
|---|---|---|---|

19. Non riesco a capire perché vado all'università e francamente non potrebbe importarmene di meno

|   |   |   |   |
|---|---|---|---|
| 1 | 2 | 3 | 4 |
|---|---|---|---|

20. Per la soddisfazione che provo quando svolgo attività accademiche difficili

|   |   |  |   |   |
|---|---|--|---|---|
| 1 | 2 |  | 3 | 4 |
|---|---|--|---|---|

21. Per dimostrare a me stesso di essere una persona intelligente

|   |   |   |   |
|---|---|---|---|
| 1 | 2 | 3 | 4 |
|---|---|---|---|

22. Per avere uno stipendio migliore dopo

|   |   |   |   |
|---|---|---|---|
| 1 | 2 | 3 | 4 |
|---|---|---|---|

23. Per continuare a imparare, attraverso gli studi, molte cose di mio interesse

|   |   |   |   |
|---|---|---|---|
| 1 | 2 | 3 | 4 |
|---|---|---|---|

24. Perché credo che pochi anni in più di istruzione miglioreranno la mia competenza lavorativa

|   |   |   |   |
|---|---|---|---|
| 1 | 2 | 3 | 4 |
|---|---|---|---|

25. Per il piacere intenso che provo quando leggo varie materie interessanti

|   |   |   |   |
|---|---|---|---|
| 1 | 2 | 3 | 4 |
|---|---|---|---|

26. Non so. Non capisco cosa sto facendo all'università

|   |   |   |   |
|---|---|---|---|
| 1 | 2 | 3 | 4 |
|---|---|---|---|

27. Perché l'università mi permette di provare una soddisfazione personale nella mia ricerca di eccellenza negli studi

|   |   |   |   |
|---|---|---|---|
| 1 | 2 | 3 | 4 |
|---|---|---|---|

28. Perché voglio mostrare a me stesso di potere avere successo negli studi

|   |   |   |   |
|---|---|---|---|
| 1 | 2 | 3 | 4 |
|---|---|---|---|

### STAIS-5 (Zsido et al, 2020)

*Sono riportate sotto alcune frasi che le persone utilizzano per descrivere loro stesse. Leggi ogni frase e poi segna il numero che indica COME TI SENTI ADESSO, in questo preciso momento. Non ci sono risposte giuste o sbagliate. Rispondi a ciascuna domanda senza pensarci troppo, ma segna la risposta che descrive meglio il tuo stato d'animo presente. Grazie.*

| Item                                          | Per nulla | Poco | Spesso | Sempre |
|-----------------------------------------------|-----------|------|--------|--------|
| Mi sento arrabbiato/agitato                   | 1         | 2    | 3      | 4      |
| Mi sento spaventato/ho paura                  |           |      |        |        |
| Mi sento nervoso                              |           |      |        |        |
| Sono un poco teso come se fossi “sulle spine” |           |      |        |        |
| Mi sento confuso                              |           |      |        |        |

### STAIT-5 (Zsido et al, 2020)

*Sono riportate sotto alcune frasi che le persone utilizzano per descrivere loro stesse. Leggi ogni frase e poi segna il numero che indica COME TI SENTI GENERALMENTE. Non ci sono risposte giuste o sbagliate. Rispondi a ciascuna domanda senza pensarci troppo, ma segna la risposta che descrive meglio il tuo stato d'animo presente. Grazie.*

| Item                                                                                                       | Per nulla | Poco | Spesso | Sempre |
|------------------------------------------------------------------------------------------------------------|-----------|------|--------|--------|
| Sento che le difficoltà si stanno accumulando così tanto che non posso superarle                           | 1         | 2    | 3      | 4      |
| Mi preoccupo molto di cose che in realtà non hanno importanza                                              |           |      |        |        |
| Alcuni pensieri insignificanti mi passano per la mente e mi disturbano.                                    |           |      |        |        |
| Accetto le delusioni così profondamente che non riesco a togliermele dalla testa.                          |           |      |        |        |
| Mi trovo in uno stato di tensione o agitazione, non appena penso alle mie preoccupazioni e scelte recenti. |           |      |        |        |

### PERSONALITY INVENTORY (Caci et al. 2014)

*Si prega di indicare, secondo la personale opinione, quanto si è d'accordo con le seguenti affermazioni.*

*Per ogni affermazione, utilizzando la tabella esposta a destra, si prega di segnare con una X il numero appropriato da 1 (completamente in disaccordo) a 5 (completamente d'accordo).*

|                                                                              | Completamente<br>in disaccordo | Molto in<br>disaccordo | Né d'accordo né<br>in disaccordo | Molto d'accordo | Completamente<br>d'accordo |
|------------------------------------------------------------------------------|--------------------------------|------------------------|----------------------------------|-----------------|----------------------------|
| Sono piuttosto stabile da un punto di vista emotivo.                         | 1                              | 2                      | 3                                | 4               | 5                          |
| Spendo molto tempo solo divertendomi.                                        | 1                              | 2                      | 3                                | 4               | 5                          |
| Ho una gamma ampia di interessi intellettuali.                               | 1                              | 2                      | 3                                | 4               | 5                          |
| Sono una persona irritabile.                                                 | 1                              | 2                      | 3                                | 4               | 5                          |
| Mi piace avere molte persone intorno a me.                                   | 1                              | 2                      | 3                                | 4               | 5                          |
| Mi piace prendere il comando delle attività di gruppo.                       | 1                              | 2                      | 3                                | 4               | 5                          |
| Sono una persona allegra e briosa.                                           | 1                              | 2                      | 3                                | 4               | 5                          |
| Preferirei cooperare con altri piuttosto che competere con loro.             | 1                              | 2                      | 3                                | 4               | 5                          |
| Spesso mi piace giocare con teorie o idee astratte.                          | 1                              | 2                      | 3                                | 4               | 5                          |
| Di solito preferisco fare le cose da solo.                                   | 1                              | 2                      | 3                                | 4               | 5                          |
| Spesso mi sento indifeso e voglio che qualcun altro risolva i miei problemi. | 1                              | 2                      | 3                                | 4               | 5                          |
| Ho molto piacere a parlare con la gente.                                     | 1                              | 2                      | 3                                | 4               | 5                          |
| Sono più un ascoltatore che un parlatore.                                    | 1                              | 2                      | 3                                | 4               | 5                          |
| Lavoro duramente per raggiungere i miei obiettivi.                           | 1                              | 2                      | 3                                | 4               | 5                          |
| Non ho una personalità forte e dominante.                                    | 1                              | 2                      | 3                                | 4               | 5                          |
| Mi piace fare lavori difficili.                                              | 1                              | 2                      | 3                                | 4               | 5                          |
| Sperimento un'ampia gamma di emozioni e sentimenti.                          | 1                              | 2                      | 3                                | 4               | 5                          |
| Mi sento incapace di maneggiare molte situazioni.                            | 1                              | 2                      | 3                                | 4               | 5                          |
| Non mi piace lasciare nulla non terminato.                                   | 1                              | 2                      | 3                                | 4               | 5                          |
| Seguo la stessa strada quando vado da qualche parte.                         | 1                              | 2                      | 3                                | 4               | 5                          |

## General Self-Efficacy Scale (Sibilia et al, 1995)

*Si prega di indicare, secondo la personale opinione, quanto si è d'accordo con le seguenti affermazioni.*

*Per ogni affermazione, utilizzando la tabella esposta a destra, si prega di segnare con una X il numero appropriato da 1 (per nulla vero) a 4 (totalmente vero).*

|                                                                                                        | Per nulla vero | Poco vero | Abbastanza vero | Totalmente vero |
|--------------------------------------------------------------------------------------------------------|----------------|-----------|-----------------|-----------------|
| Riesco sempre a risolvere problemi difficili se ci provo abbastanza seriamente.                        | 1              | 2         | 3               | 4               |
| Se qualcuno mi contrasta, posso trovare il modo o il sistema di ottenere ciò che voglio                | 1              | 2         | 3               | 4               |
| Per me è facile attenermi alle mie intenzioni e raggiungere i miei obiettivi                           | 1              | 2         | 3               | 4               |
| Ho fiducia di poter affrontare efficacemente eventi inattesi                                           | 1              | 2         | 3               | 4               |
| Grazie alle mie risorse, so come gestire situazioni impreviste                                         | 1              | 2         | 3               | 4               |
| Posso risolvere la maggior parte dei problemi se ci metto il necessario impegno                        | 1              | 2         | 3               | 4               |
| Rimango calmo nell'affrontare le difficoltà perché posso confidare nelle mie capacità di fronteggiarle | 1              | 2         | 3               | 4               |
| Quando mi trovo di fronte ad un problema, di solito trovo parecchie soluzioni                          | 1              | 2         | 3               | 4               |
| Se sono in "panne", posso sempre pensare a qualcosa da mettere in atto                                 | 1              | 2         | 3               | 4               |
| Non importa quello che mi può capitare, di solito sono in grado di gestirlo                            | 1              | 2         | 3               | 4               |

### Fear of COVID-19 scale (FCV-19s- Ahorsu et al., 2020)

*Si prega di indicare, secondo la personale opinione, quanto si è d'accordo con le seguenti affermazioni.*

*Per ogni affermazione, utilizzando la tabella esposta a destra, si prega di segnare con una X il numero appropriato da 1 (completamente in disaccordo) a 5 (completamente d'accordo).*

|                                                                                                  | Completamente<br>in disaccordo | Molto in<br>disaccordo | Né d'accordo né<br>in disaccordo | Molto d'accordo | Completamente<br>d'accordo |
|--------------------------------------------------------------------------------------------------|--------------------------------|------------------------|----------------------------------|-----------------|----------------------------|
| Ho una grande paura del coronavirus-19                                                           | 1                              | 2                      | 3                                | 4               | 5                          |
| Mi mette a disagio pensare al coronavirus-19                                                     | 1                              | 2                      | 3                                | 4               | 5                          |
| Mi sudano le mani quando penso al coronavirus-19                                                 | 1                              | 2                      | 3                                | 4               | 5                          |
| Ho paura di morire a causa del coronavirus-19                                                    | 1                              | 2                      | 3                                | 4               | 5                          |
| Quando guardo notizie e storie sul coronavirus-19 sui social media,<br>divento nervoso o ansioso | 1                              | 2                      | 3                                | 4               | 5                          |
| Non riesco a dormire perché sono preoccupato di infettarmi con il<br>coronavirus-19              | 1                              | 2                      | 3                                | 4               | 5                          |
| Il cuore batte forte o palpita quando penso di infettarmi con il<br>coronavirus-19               | 1                              | 2                      | 3                                | 4               | 5                          |
